# Supplementary material
Source: PubMed Central journal article supplement (PMC8958287)
Supplement: sj-pdf-1-jag-10.1177_07334648221081124.pdf [file sj-pdf-1-jag-10.1177_07334648221081124.pdf]

Supplemental File

Consolidated criteria for reporting qualitative studies (COREQ): 32-item checklist

| No                                      | Item                                 | Guide                                                                                                                                                                               |
|-----------------------------------------|--------------------------------------|-------------------------------------------------------------------------------------------------------------------------------------------------------------------------------------|
| Domain 1: Research Team and reflexivity |                                      |                                                                                                                                                                                     |
| Personal Characteristics                |                                      |                                                                                                                                                                                     |
| 1                                       | Interviewer                          | Emily Franzosa                                                                                                                                                                      |
| 2                                       | Credentials                          | PhD                                                                                                                                                                                 |
| 3                                       | Occupation                           | Researcher                                                                                                                                                                          |
| 4                                       | Gender                               | female                                                                                                                                                                              |
| 5                                       | Experience/Training                  | Highly published, experienced qualitative researcher                                                                                                                                |
| Relationship with Participants          |                                      |                                                                                                                                                                                     |
| 6                                       | Relationship established             | Members of the study team did not have a previous relationship with any participants                                                                                                |
| 7                                       | Participant knowledge of interviewer | Participants did not have knowledge of the study team prior to interviews/focus groups                                                                                              |
| 8                                       | Interviewer characteristics          | Not reported                                                                                                                                                                        |
| Domain 2: Study Design                  |                                      |                                                                                                                                                                                     |
| 9                                       | Methodological orientation           | Directed content analysis                                                                                                                                                           |
| Participant selection                   |                                      |                                                                                                                                                                                     |
| 10                                      | Sampling                             | Combination of purposive and convenience sampling was utilized                                                                                                                      |
| 11                                      | Method of approach                   | Focus groups were conducted remotely with participants at their workplace; administrators were interviewed via telephone                                                            |
| 12                                      | Sample size                          | 56 certified nursing assistants; 5 administrators                                                                                                                                   |
| 13                                      | Non-participation                    | 9 facilities were approached and 6 agreed to participate. 1 facility was unable to schedule focus groups due to an increasing number of covid cases                                 |
| Setting                                 |                                      |                                                                                                                                                                                     |
| 14                                      | Setting of data collection           | Nursing home workplace                                                                                                                                                              |
| 15                                      | Presence of non-participants         | Only the participants and researchers (moderator and assistant moderator) were present during the focus group, and only the interviewer was present in the administrator interviews |
| 16                                      | Sample description                   | CNAs were mostly: female, Black, age 40-59, with over 10 years work experience. Administrators had a median of 10 years work experience at their current facility.                  |
| Data Collection                         |                                      |                                                                                                                                                                                     |
| 17                                      | Interview guide                      | Questions, prompts were used; the interview guide was pilot tested                                                                                                                  |
| 18                                      | Repeat interviews                    | no                                                                                                                                                                                  |
| 19                                      | Audio/visual recoding                | A/V recording was used for the virtual focus groups                                                                                                                                 |
| 20                                      | Field notes                          | Field notes were taken during the focus groups by the assistant moderator                                                                                                           |
| 21                                      | Duration                             | 45-minute focus groups were conducted with CNAs and 30-45 minute telephone interviews were conducted with administrators                                                            |
| 22                                      | Data saturation                      | yes                                                                                                                                                                                 |

|                               |                              |                                                       |
|-------------------------------|------------------------------|-------------------------------------------------------|
| 23                            | Transcripts returned         | no                                                    |
| Domain 3: Analysis & findings |                              |                                                       |
| 24                            | Number of data coders        | 4                                                     |
| 25                            | Description of coding tree   | no                                                    |
| 26                            | Derivation of themes         | Themes were derived both in advance and from the data |
| 27                            | Software                     | Dedoose qualitative software                          |
| 28                            | Participant checking         | no                                                    |
| Reporting                     |                              |                                                       |
| 29                            | Quotations presented         | yes                                                   |
| 30                            | Data and findings consistent | yes                                                   |
| 31                            | Clarity of major themes      | yes                                                   |
| 32                            | Clarity of minor themes      | yes                                                   |
